# Supplementary material for: Tryptophan Photoproduct FICZ Upregulates IL1A, IL1B, and IL6 Expression via Oxidative Stress in Keratinocytes
Source: Hindawi journal article supplement (doi:10.1155/2018/9298052), 2018-01-01
Supplement: f1 [file 9298052.f1.pdf]

# Supplementary Figure S1

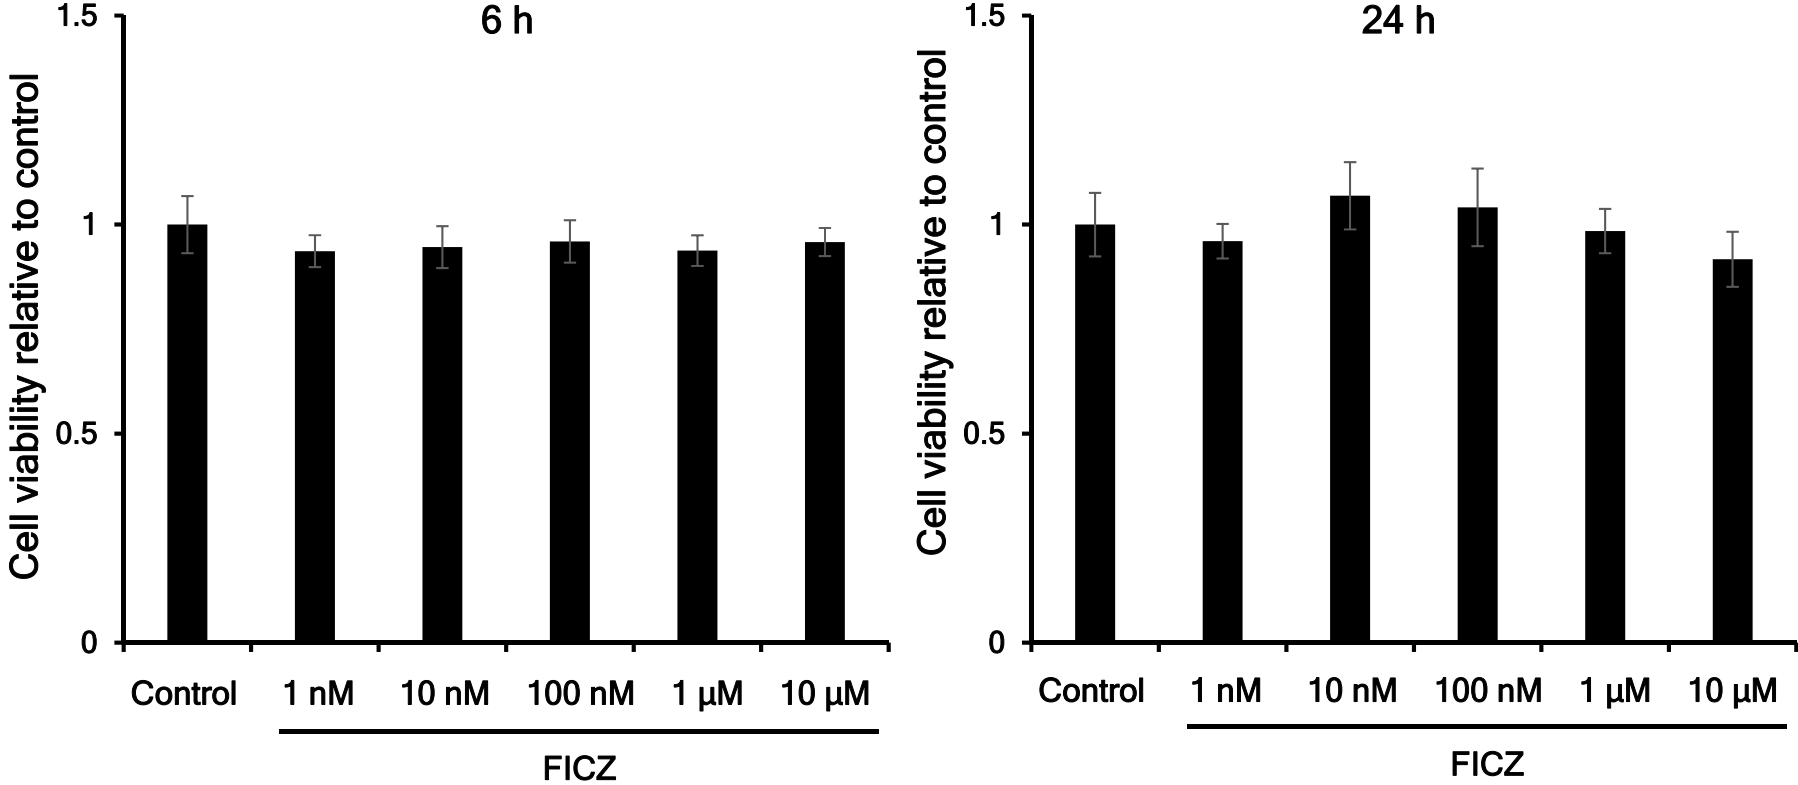

**Supplementary Figure S1: FICZ does not affect the viability of HaCaT keratinocytes.**  
The viability of HaCaT cells treated with DMSO (0.1%, control) or FICZ (1, 10, or 100 nM or 1 or 10 μM) for 6 or 24 h was assessed by using a WST-8 formazan-based method. Data are presented as means ± standard deviation (n = 5 per group).

# Supplementary Figure S2

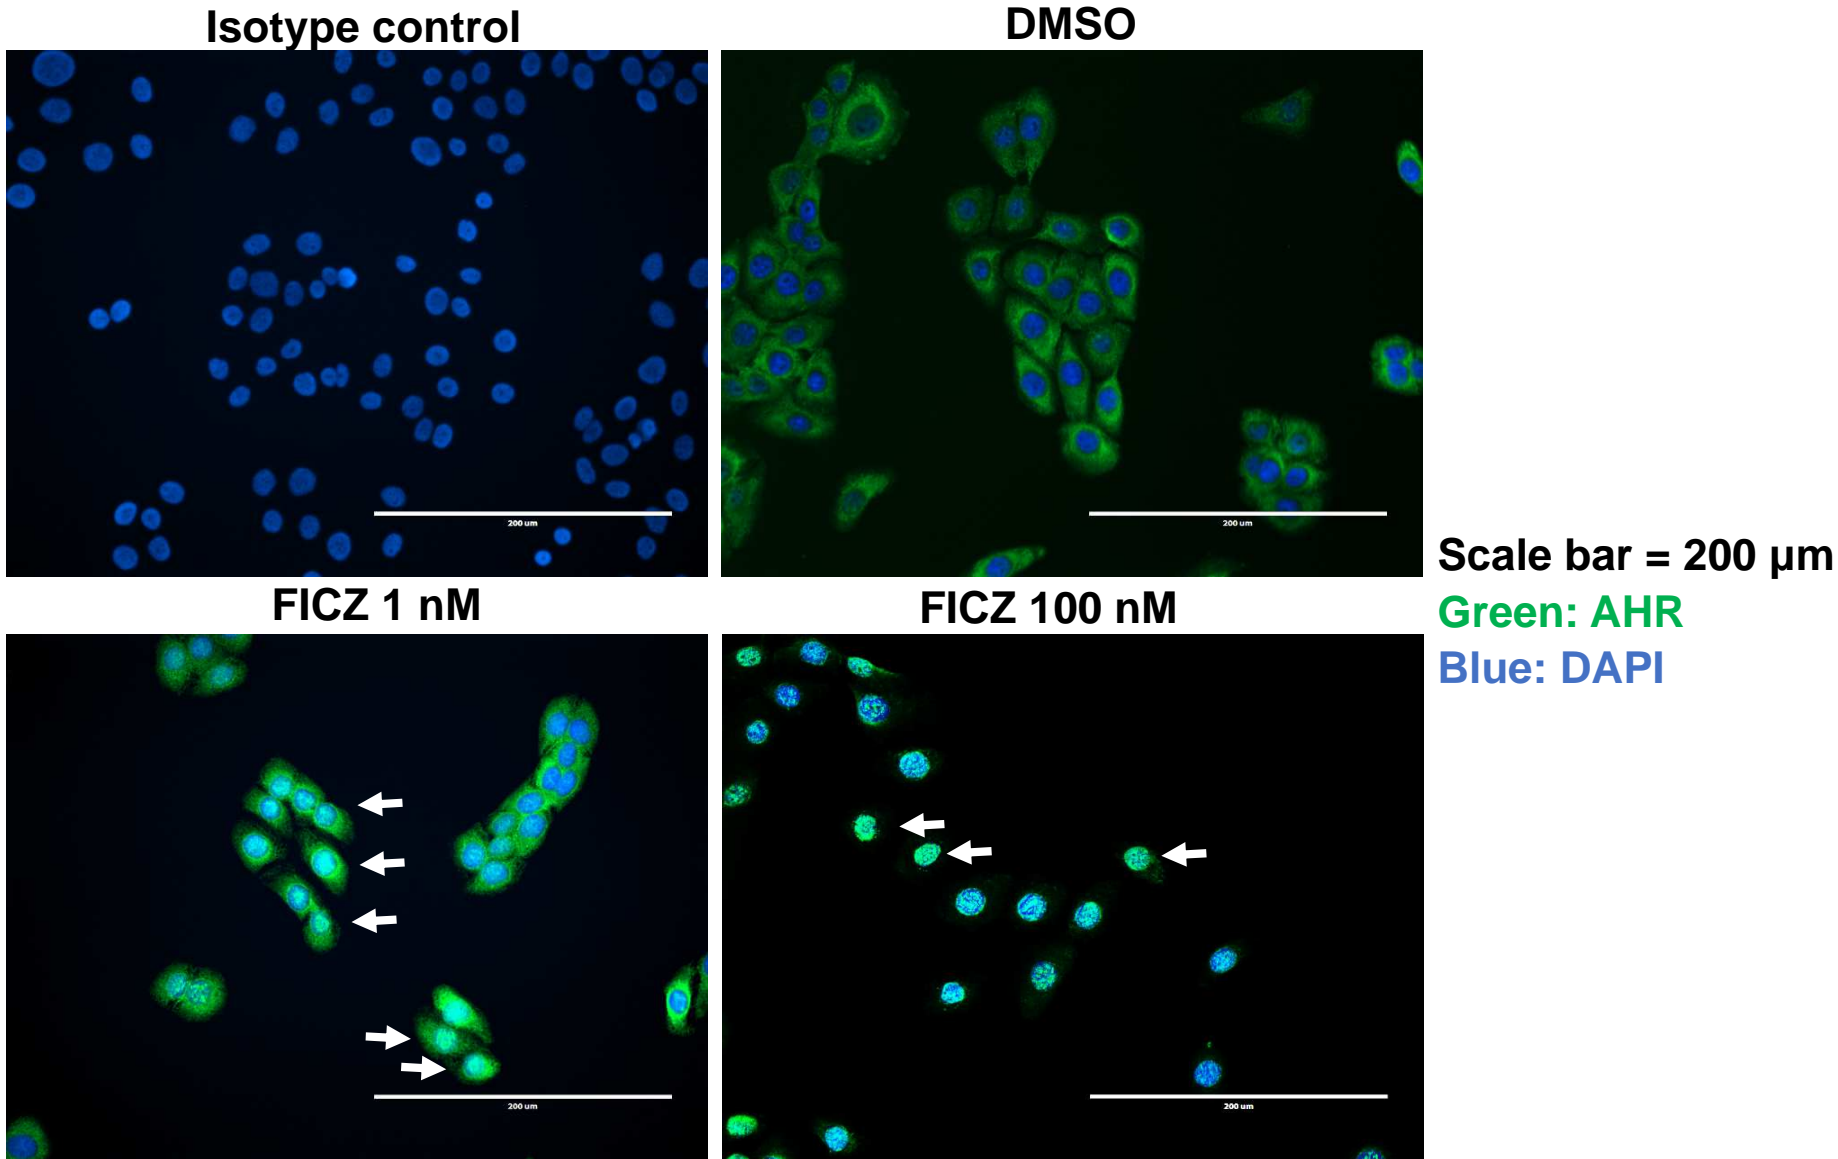

**Supplementary Figure S2: FICZ induces cytoplasmic to nuclear translocation of AHR.** HaCaT cells were treated with DMSO (0.1%, control) or FICZ (1 and 100 nM) for 6 h and were immunostained with AHR. AHR was mainly localized in the cytoplasm in DMSO-treated control, while its nuclear translocation was induced by FICZ even at a concentration of 1 nM (arrows).

# Supplementary Figure S3

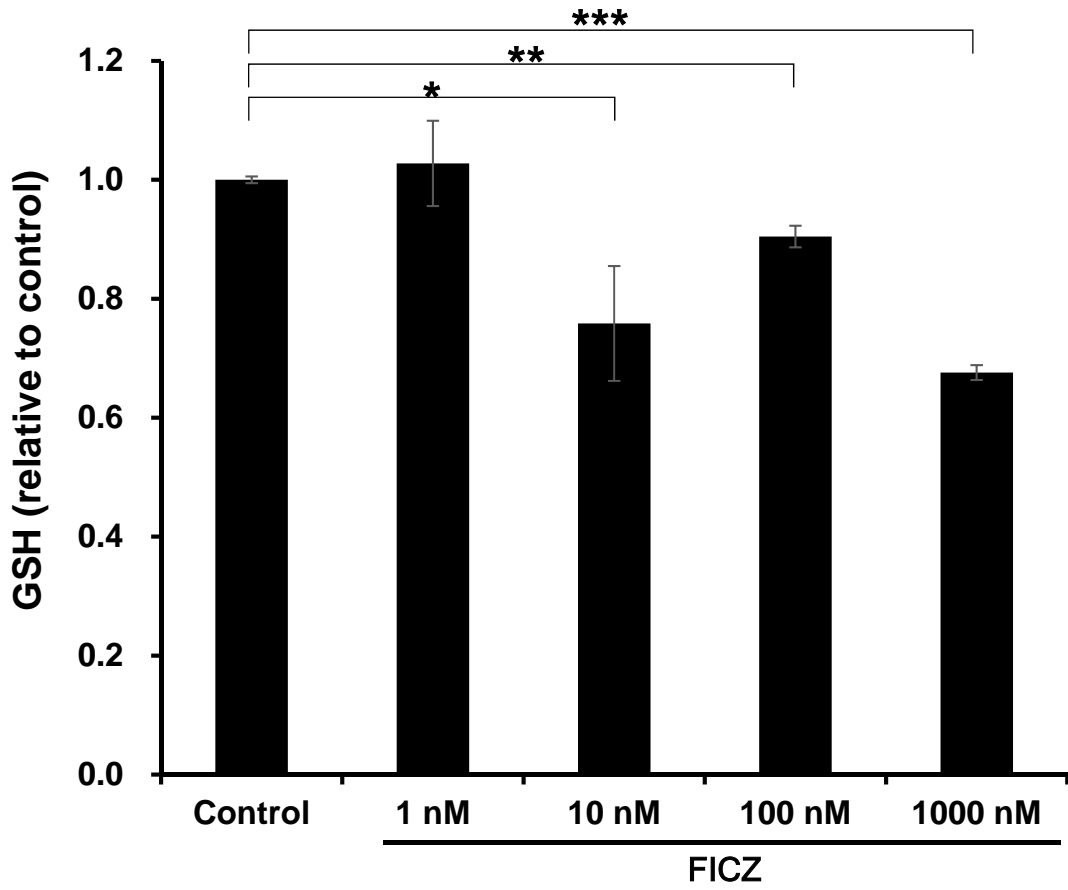

**Supplementary Figure S3: FICZ induces intracellular glutathione (GSH) reduction.**

HaCaT cells were treated with DMSO (0.1%, control) or FICZ (1, 10, 100 or 1000 nM) for 6 h and analyzed by GSH reduction assay. FICZ (10 to 1000 nM) did reduce the intracellular level of glutathione, implicating the production of ROS. Data are presented as means  $\pm$  standard deviation (n = 3 per group).

# Supplementary Figure S4

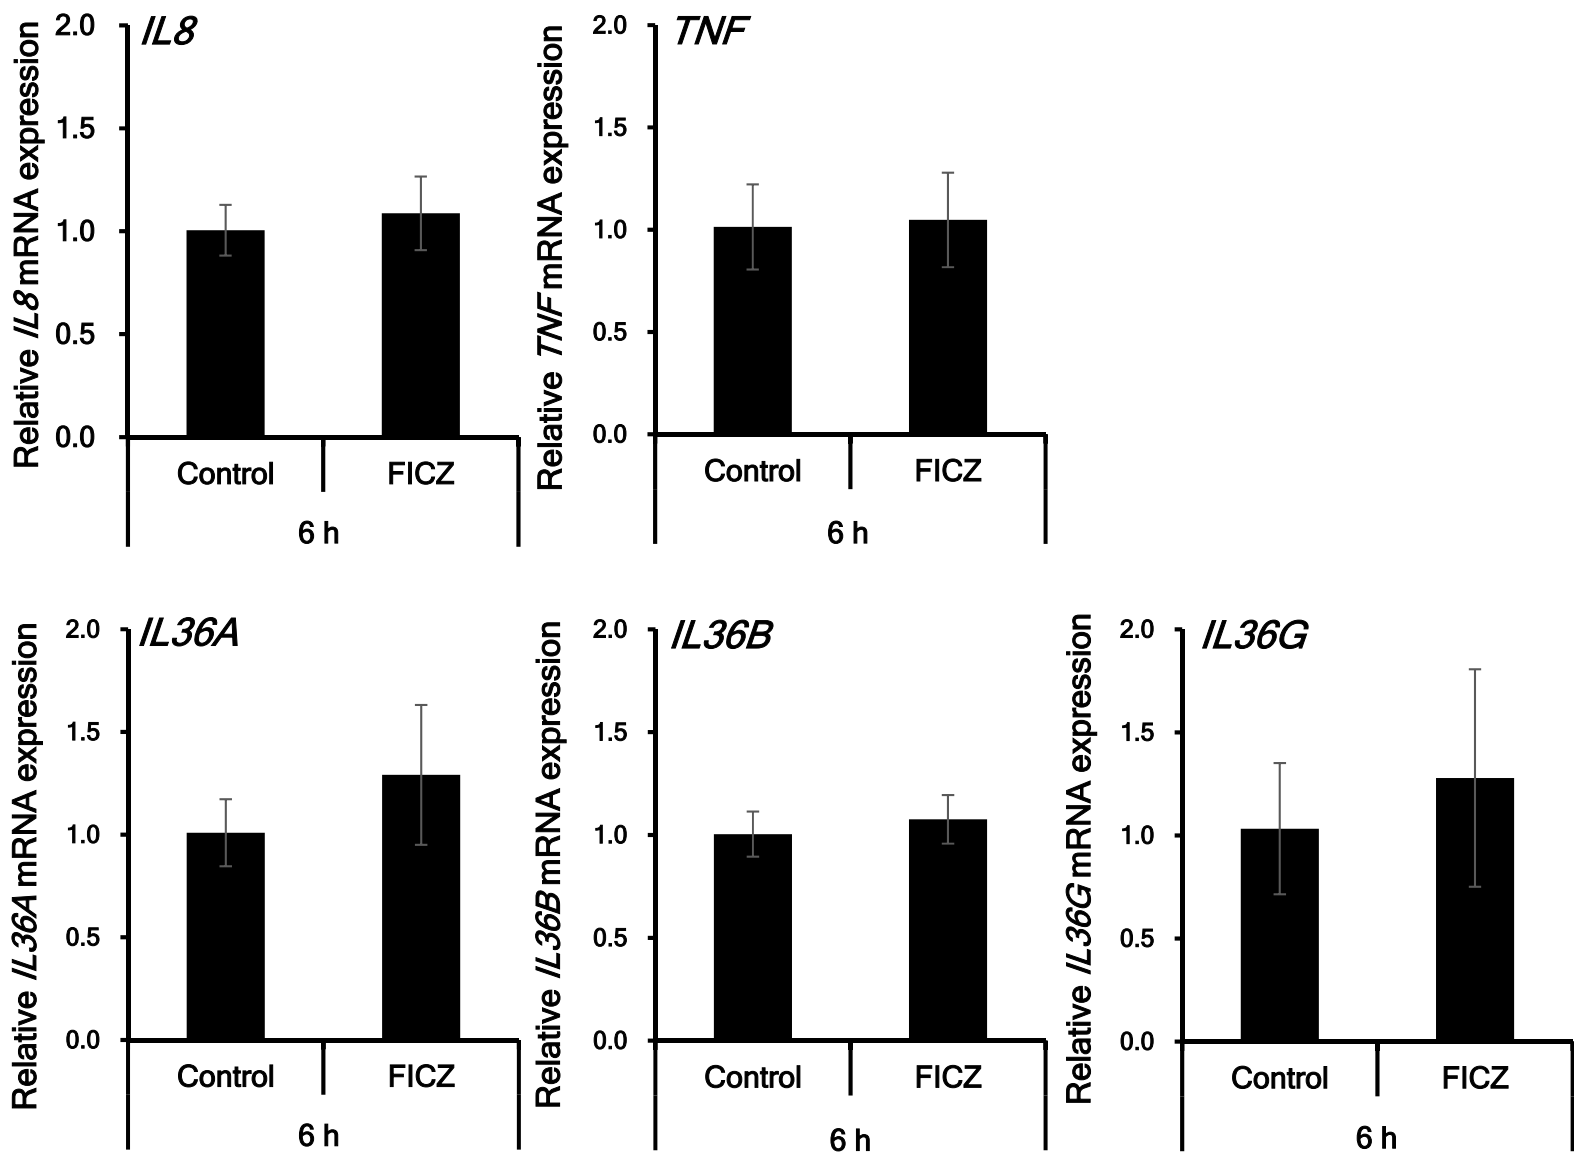

**Supplementary Figure S4: Expression of proinflammatory cytokine mRNAs in keratinocytes treated with FICZ (100 nM).**

Expression of *IL8*, *TNF*, *IL36A*, *IL36B*, and *IL36G* in the same sample as in Figure 4 was measured by qRT-PCR. Data are presented as means  $\pm$  standard deviation (n = 3 per group).

# Supplementary Figure S5

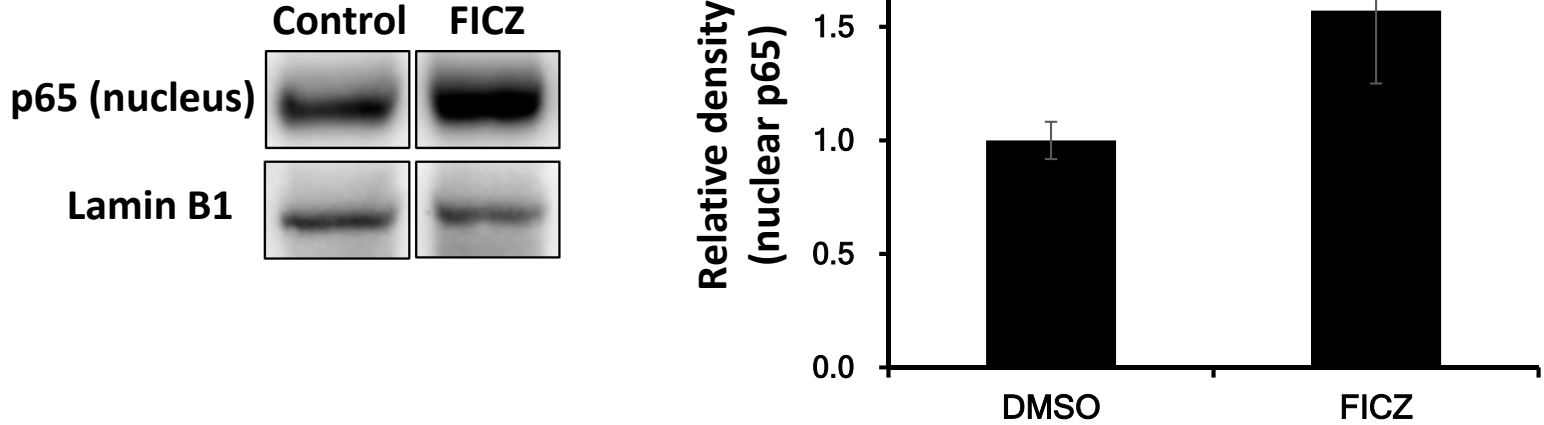

### Supplementary Figure S4: FICZ activates NF-κB signaling.

HaCaT cells were treated with DMSO (0.1%, control) or FICZ (100 nM) and nuclear translocation of NFκB p65 was evaluated by western blot. Representative image of bands (left panel) and density of nuclear NF-κB p65 relative to DMSO-treated control (right panel) are shown. Nuclear Lamin B1 protein was used as internal control. Data are presented as means ± standard deviation (n = 3 per group).

Supplementary Figure S6

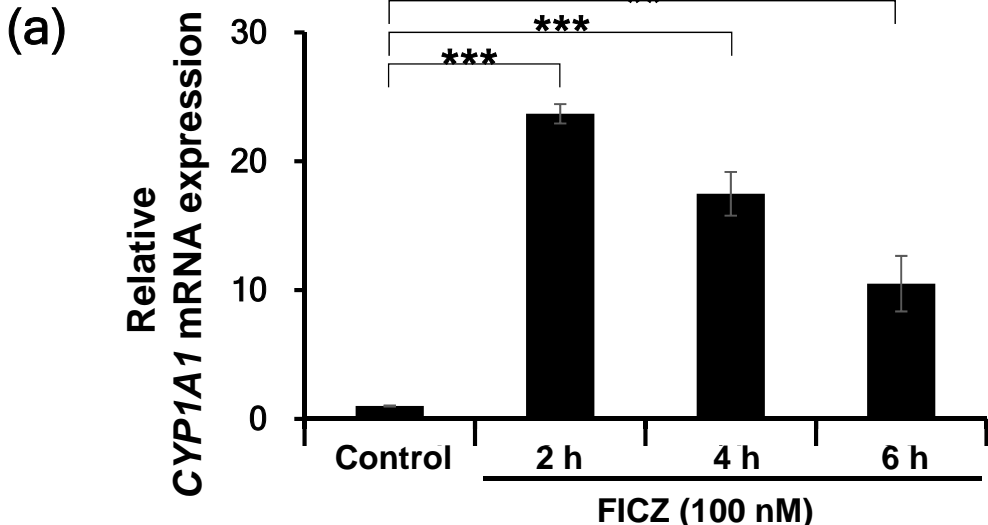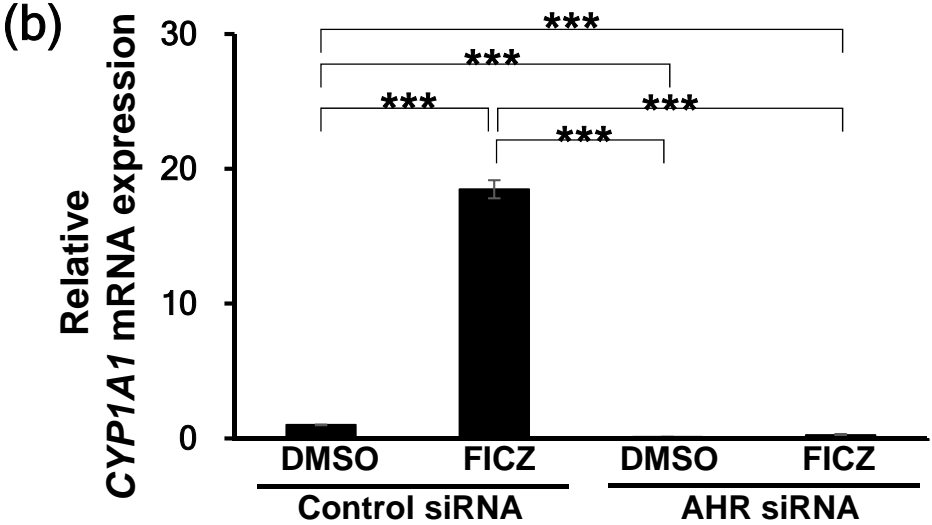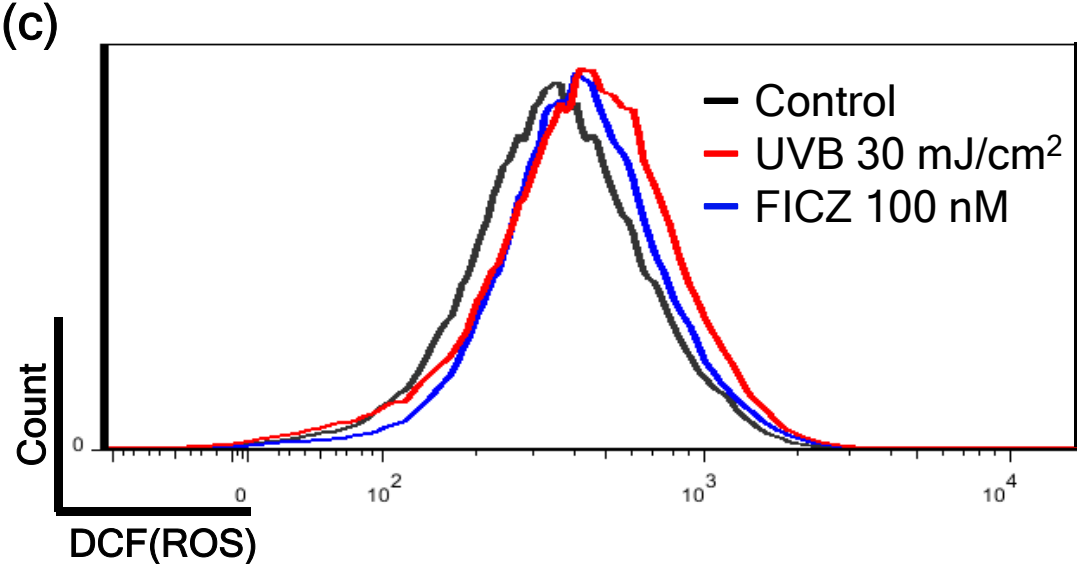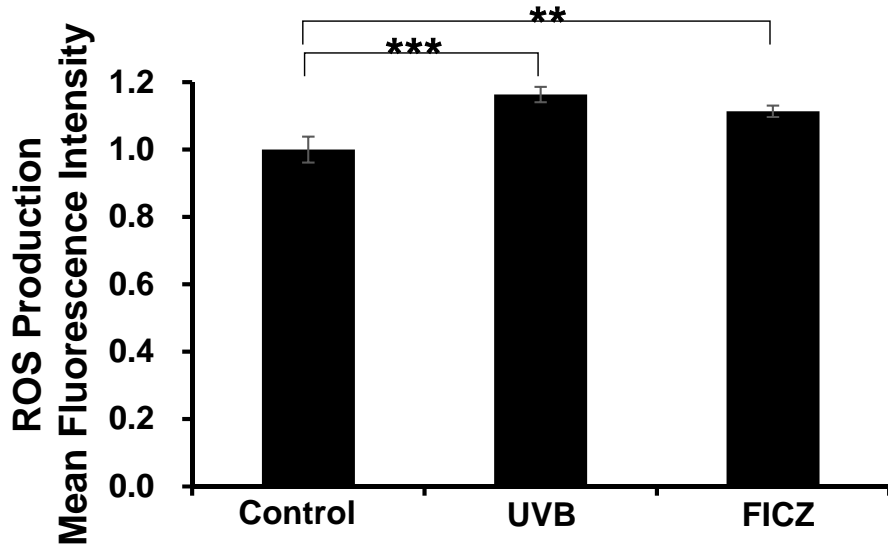

**Supplementary Figure S6: FICZ induces CYP1A1 and ROS production in normal human keratinocytes.**

Normal human epidermal keratinocytes (NHEKs) were (a) treated with DMSO (0.1%, control) or FICZ (100 nM) for 2, 4 and 6 h, or were (b) transfected with control siRNA or AHR siRNA, further treated with DMSO (0.1%) or FICZ (100 nM), and assessed for the expression of *CYP1A1* mRNA. (c) NHEKs were irradiated with UVB (30 mJ/cm<sup>2</sup>) or treated with FICZ (100 nM) and ROS production at 6 h-post treatment was evaluated by flow cytometry. Representative image of histogram (left panel) and mean fluorescence intensity of DCF (right panel) are shown. Data are presented as means ± standard deviation (n = 3 per group).
